# Supplementary material for: A first-principles study on the electronic and optical properties of a type-II C2N/g-ZnO van der Waals heterostructure
Source: Royal Society of Chemistry journal article supplement (doi:10.1039/d1cp00122a), 2021-01-01
Supplement: d1cp00122a1.pdf [file d1cp00122a1.pdf]

## SUPPLEMENTARY INFORMATION

### First-principles study on Electronic and Optical Properties of the Type-II C<sub>2</sub>N/g-ZnO van der Waals Heterostructure

Jianxun Song<sup>1</sup>, Hua Zheng<sup>1</sup>, Minxia Liu<sup>1</sup>, Geng Zhang<sup>1</sup>, Dongxiong Ling<sup>1</sup>, Dongshan Wei<sup>1,\*</sup>

#### Phonon Spectrum Calculation

In order to verify the dynamical stability of C<sub>2</sub>N/g-ZnO heterostructure, the phonon dispersion curves of C<sub>2</sub>N/g-ZnO heterostructure were calculated. Due to the large system of the C<sub>2</sub>N/g-ZnO heterostructure, we calculated the phonon band according to finite-differences method with a  $2 \times 2 \times 1$  supercell including 128 atoms. It can be seen from the phonon band diagram that there is only tiny imaginary frequency near the G point as shown in Fig. S1, which may come from the acoustic nature. It will not affect the overall dynamical stability of heterostructure. It is proved that there is van der Waals force between layers of the heterostructure, and the heterostructure has a dynamical stability.

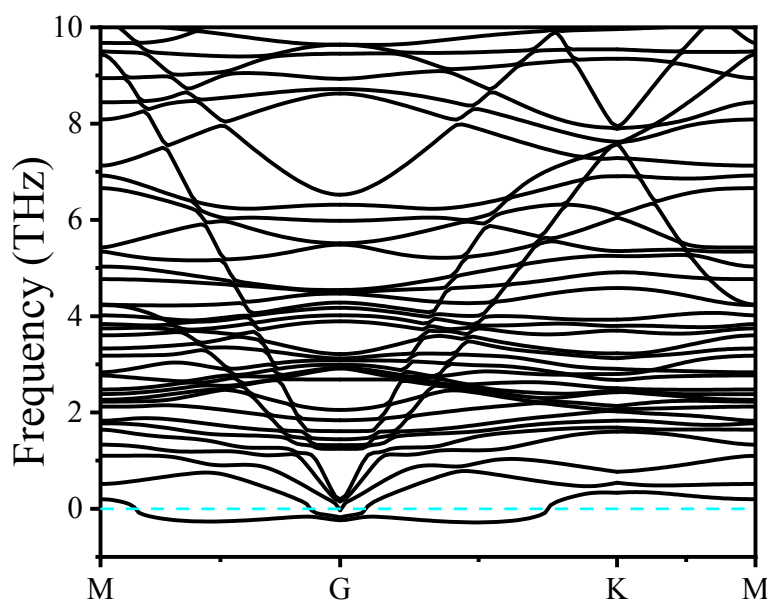

Figure S1. Phonon dispersion curves of C<sub>2</sub>N/g-ZnO heterostructure

## Ab Initio Molecular Dynamics Simulation

To further confirm the kinetic(thermal) stability of the  $C_2N/g-ZnO$  heterostructure, an ab initio molecular dynamics (AIMD) simulation is performed with a  $2 \times 2 \times 1$  supercell at 300 K and lasts 5 ps with a timestep of 1 fs. As shown in Fig. S2, both fluctuations of the total potential energy and the system temperature are very small, especially after 2 ps, indicating that the  $C_2N/g-ZnO$  heterostructure is thermally stable.

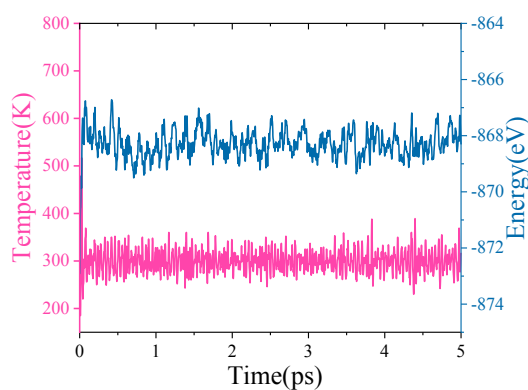

**Figure S2.** Variations of the total potential of the  $C_2N/g-ZnO$  heterostructure and the system temperature with simulation time.
